# Supplementary material for: Psicopatología en el período de desintoxicación hospitalaria de Adictos a Opiáceos
Source: Oxford University Press journal article supplement (doi:10.1158/0008-5472.can-14-2735), 1991-01-01
Supplement: 00085472can142735-sup-137957_1_supp_2739740_nrw0py.docx [file 00085472can142735-sup-137957_1_supp_2739740_nrw0py.docx]

**Supplemental Table 4:** Rate and time of tumor formation in orthotopic tongue model for individual *TP53* mutations in PCI13 and UMSCC1 HNSCC cell lines.

| **Cell line** | **PCI 13** | | | **UMSCC1** | | |
| --- | --- | --- | --- | --- | --- | --- |
| ***TP53 status*** | **# of mice injected** | **Tumor formation (%)** | **Day of Tumor Formation** | **# of mice injected** | **Tumor formation (%)** | **Day of Tumor Formation** |
| Wildtype | 18 | 16/18 (89) | 14 | 17 | 17/17 (100) | 7 |
| pBabe | 18 | 16/18 (89) | 7 | 17 | 16/17 (94) | 7 |
| A161S | 17 | 16/17 (94) | 7 | 8 | 6/8 (75) | 14 |
| F134C | 4 | 4/4 (100) | 10 | 14 | 14/14 (100) | 11 |
| R175H | 15 | 15/15 (100) | 7 | 7 | 7/7 (100) | 11 |
| H179Y | 15 | 14/15 (93) | 14 | 10 | 10/10 (100) | 7 |
| C238F | 16 | 15/16 (94) | 14 | 18 | 18/18 (100) | 7 |
| G245D | 16 | 16/16 (100) | 7 | 10 | 10/10 (100) | 7 |
