# Supplementary material for: Psicopatología en el período de desintoxicación hospitalaria de Adictos a Opiáceos
Source: Oxford University Press journal article supplement (doi:10.1158/0008-5472.can-14-2735), 1991-01-01
Supplement: 00085472can142735-sup-137957_1_supp_2739742_n9w0py.docx [file 00085472can142735-sup-137957_1_supp_2739742_n9w0py.docx]

**Supplemental Table 6:** Stratification of *TP53* mutations by either disruptive or truncating systems in the validation set did not identify a subset of mutations associated with decreased overall survival, disease free survival, or time to distant metastases.

|  |  | **Overall Survival** | | | **Disease Free Survival** | | | **Time to Distant Metastases** | | |
| --- | --- | --- | --- | --- | --- | --- | --- | --- | --- | --- |
| **Prognostic variable** | **Total** | **HR** | **95% CI** | **p-value** | **HR** | **95% CI** | **p-value** | **HR** | **95% CI** | **p-value** |
| **Disruptive** |  |  |  |  |  |  |  |  |  |  |
| Wildtype (ref) | 49 |  |  |  |  |  |  |  |  |  |
| No | 37 | 1.40 | (0.83, 2.36) | 0.9873 | 1.31 | (0.80, 2.16) | 0.2879 | 2.08 | (0.83, 5.17) | 0.1160 |
| Yes | 32 | 1.41 | (0.82, 2.41) | 0.2072 | 1.37 | (0.81, 2.32) | 0.2410 | 2.50 | (0.99, 6.34) | 0.0538 |
| **Truncating** |  |  |  |  |  |  |  |  |  |  |
| Wildtype (ref) | 49 |  |  |  |  |  |  |  |  |  |
| No | 47 | 1.34 | (0.82, 2.21) | 0.2463 | 1.25 | (0.78, 2.02) | 0.3527 | 2.03 | (0.84, 4.90) | 0.1162 |
| Yes | 22 | 1.51 | (0.85, 2.70) | 0.1603 | 1.52 | (0.86, 2.69) | 0.1518 | 2.77 | (1.04, 7.39) | 0.0420 |
